# Supplementary material
Source: ML conference proceedings conference paper supplement (https://proceedings.mlr.press/v54/thomas17a.html)
Supplement: Supplementary file [file thomas17a-supp.pdf]

# Supplementary material - Anomaly Detection in Extreme Regions via Empirical MV-sets on the Sphere

Albert Thomas, Stephan Cléménçon, Alexandre Gramfort,  
Anne Sabourin

## 1 Proof of Theorem 1

Throughout the proof, we assume that the marginal c.d.f.  $F_j$ ,  $j = 1, \dots, d$ , are known. In other words, we analyze a surrogate of the spherical MV-set algorithm, where  $\widehat{\mathbf{V}}$  may be taken as  $\mathbf{V}$  itself. Recall the definition of the finite distance angular measure  $\Phi_t(A) = t\mathbb{P}(\mathbf{V} \in t\mathcal{C}_A)$ ,  $A \subset \mathbb{S}_{d-1}$ , where  $\mathcal{C}_A = \{tx, x \in A, t \geq 1\}$  is the truncated cone generated by  $A$ . Notice  $\Phi(A) = \lim_{t \rightarrow \infty} \Phi_t(A)$  and the underlying regular variation assumption may be recast as  $\mathbb{P}(r(\mathbf{V}) \geq t, \theta(\mathbf{V}) \in A) \approx t^{-1}\Phi(A) \approx t^{-1}\Phi_t(A)$  when  $t$  is large. Observe the following error decomposition

$$\sup_{B \in \mathcal{G}} |\widehat{\Phi}_{n,k} - \Phi|(B) \leq \sup_{B \in \mathcal{G}} |\widehat{\Phi}_{n,k}(B) - \Phi_{n/k}(B)| + \underbrace{\sup_{B \in \mathcal{G}} |\Phi_{n/k} - \Phi|(B)}_{\text{bias}(n/k, F, \Phi)}. \quad (1)$$

In this paper we do not attempt to control the bias term. This may be done under additional assumptions usually referred to as ‘second order assumptions’ (see *e.g.* [1], Chapter 3). Our analysis focuses on the first term in the right-hand side of (1). The following result is crucial for our purposes.

**Lemma 1** (a normalized VC-inequality for low probability, finite classes). *Let  $\mathcal{A}$  be a class of sets of finite cardinality  $|\mathcal{A}|$  within a sample space  $E$  and let  $\mathbf{Y}_1, \dots, \mathbf{Y}_n$  be an i.i.d. sample of random  $E$ -valued variables distributed as  $\mathbf{Y}$ . Define the probability of hitting a member of the class,  $p = \mathbb{P}(\mathbf{Y} \in \cup_{A \in \mathcal{A}} A)$ . Consider the relative Rademacher average*

$$\mathcal{R}_{n,p} = \mathbb{E} \sup_{A \in \mathcal{A}} \frac{1}{np} \left| \sum_{i=1}^n \sigma_i \mathbf{1}_{\mathbf{Y}_i \in A} \right|.$$

Then  $\mathcal{R}_{n,p}$  satisfies

$$\mathcal{R}_{n,p} \leq \sqrt{\frac{2 \log(|\mathcal{A}|)}{np}}, \quad (2)$$

and for any  $\delta \geq e^{-np}$ , with probability  $1 - \delta$ ,

$$\begin{aligned} \frac{1}{p} \sup_{A \in \mathcal{A}} \left| \mathbb{P}(\mathbf{Y} \in A) - \frac{1}{n} \sum_{i=1}^n \mathbb{1}_{\mathbf{Y}_i \in A} \right| &\leq 2\mathcal{R}_{n,p} + 3\sqrt{\frac{1}{np} \log \frac{1}{\delta}} \\ &\leq \frac{1}{\sqrt{np}} \left[ 2\sqrt{2 \log |\mathcal{A}|} + 3\sqrt{\log(1/\delta)} \right]. \quad (3) \end{aligned}$$

*Proof.* The bound (2) in the statement is a variation on the result established in [5], Lemma 14, which states that, for a VC class of dimension  $V_{\mathcal{A}}$ ,  $\mathcal{R}_{n,p} \leq C\sqrt{V_{\mathcal{A}}/(np)}$ , where  $C$  is a universal constant. To obtain the stated inequality and remove the unknown constant, we replace the upper bound on the standard Rademacher average  $\mathcal{R}_K \leq C\sqrt{V_{\mathcal{A}}/K}$  used in their proof by the usual bound (see e.g. [2]) combined with the fact that, for finite classes, the shattering coefficient satisfies  $S_{\mathcal{A}} \leq |\mathcal{A}|$  (see [4], Theorem 13.6), i.e.

$$\mathcal{R}_K \leq \sqrt{\frac{2 \log S_{\mathcal{A}}(K)}{K}} \leq \sqrt{\frac{2 \log |\mathcal{A}|}{K}},$$

where  $K$  is the number of  $\mathbf{Y}_i$  which hit the class  $\mathcal{A}$ . The rest of the proof of the above mentioned lemma is unchanged, which yields (2). The high probability bound (3) is then obtained as a direct consequence of Theorem 10 in the cited reference.  $\square$

**Proposition 1.** *Under the assumptions of Theorem 1, and with the notations of Lemma 1, with probability at least  $1 - \delta$ ,*

$$\sup_{B \in \mathcal{G}} \left| \Phi_{n/k}(B) - \widehat{\Phi}_{n,k}(B) \right| \leq \sqrt{\frac{d}{k}} \left[ 2\sqrt{2 \log(2) d J^{d-1}} + 3\sqrt{\log(1/\delta)} \right]. \quad (4)$$

*Proof.* Consider the class of sets  $\mathcal{A} = \{\frac{n}{k} \mathcal{C}_B, B \in \mathcal{G}\}$  in the sample space  $E = \mathbb{R}_+^d$ , and take  $\mathbf{Y}, \mathbf{Y}_i = \mathbf{V}, \mathbf{V}_i, 1 \leq i \leq n$  in Lemma 1. Then the probability of the class union is  $p \leq dk/n$ , and inequality (3) implies

$$\begin{aligned} \sup_{B \in \mathcal{G}} \left| \Phi_{n/k}(B) - \widehat{\Phi}_{n,k}(B) \right| &= \sup_{B \in \mathcal{G}} \left| \frac{n}{k} \sum_{i=1}^n \mathbb{1}_{\mathbf{V}_i \in \frac{n}{k} \mathcal{C}_B} - \frac{n}{k} \mathbb{P}(\mathbf{V} \in \frac{n}{k} \mathcal{C}_B) \right| \\ &= \frac{n}{k} \sup_{A \in \mathcal{A}} \left| \sum_{i=1}^n \mathbb{1}_{\mathbf{V}_i \in A} - \mathbb{P}(\mathbf{V} \in A) \right| \\ &\leq \frac{n}{k} \frac{p}{\sqrt{np}} \left[ 2\sqrt{2 \log |\mathcal{A}|} + 3\sqrt{\log(1/\delta)} \right] \\ &\leq \sqrt{\frac{d}{k}} \left[ 2\sqrt{2 \log |\mathcal{A}|} + 3\sqrt{\log(1/\delta)} \right] \end{aligned}$$

which is the desired inequality, considering that  $|\mathcal{A}| = |\mathcal{G}| = 2^{dJ^{d-1}}$ .  $\square$

Following the proof of theorem 3 in [6], we obtain the desired result.

## 2 Model selection

Let  $\widehat{\Omega}_\alpha^J$  denote the solution of the problem (9) over  $\mathcal{G} = \mathcal{G}_J$ . One should pick the value

$$\widehat{J} = \arg \min_{J_{\min} \leq J \leq J_{\max}} \left\{ \lambda_d(\widehat{\Omega}_\alpha^J) + \psi_k(\delta, J) \right\}, \quad (5)$$

minimizing thus a complexity-penalized version of the volume, in order to estimate the MV-set over  $\mathbf{G} = \cup_{J=1}^{J_{\max}} \mathcal{G}_J$  as accurately as possible without overfitting the data. An oracle inequality showing that the chosen set  $\widehat{\Omega}_\alpha^{\widehat{J}}$  corresponds to an optimal trade-off between excess volume and missing mass can be straightforwardly derived from the analysis carried out in subsection 3.2, just like in Theorem 11 in [6].

We first introduce the risk of a set  $\Omega$  defined as

$$R(\Omega) = (\lambda_d(\Omega) - \lambda_d(\Omega_\alpha^*))_+ + (\alpha - \Phi_{n/k}(\Omega))_+$$

where, for any  $u \in \mathbb{R}^d$ , we denote by  $u_+ = \max(u, 0)$  its positive part. From Theorem 1, we have with probability at least  $1 - \delta$ ,

$$R(\widehat{\Omega}_\alpha) \leq \left( \inf_{\Omega \in \mathcal{G}_\alpha} \lambda_d(\Omega) - \lambda_d(\Omega_\alpha^*) \right) + 2\psi_k(\delta).$$

The first term can be viewed as the approximation error and the second term as a bound on the stochastic error. The goal of model selection through complexity penalization is to find the model  $\mathcal{G}_J$  achieving the optimal trade-off between these two errors.

As in [6], we thus consider the solution  $\widehat{\Omega}_\alpha$  of the following optimization problem that can be viewed as the structural risk minimization version of (7)

$$\widehat{\Omega}_\alpha \in \arg \min_{\Omega \in \mathbf{G}} \left\{ \lambda_d(\Omega) + 2\psi_k(2^{-J}\delta, J), \widehat{\Phi}_{n,k}(\Omega) \geq \alpha - \psi_k(2^{-J}\delta, J) \right\} \quad (6)$$

where for each  $J \in \{1, \dots, J_{\max}\}$  and each  $\delta \in (0, 1)$ ,  $\psi_k(\delta, J)$  denotes a penalty for the model  $\mathcal{G}_J$ .

Following the steps of the proof of Theorem 11 in [6] we have the following oracle inequality.

**Theorem 1.** *Assume that assumptions  $\mathbf{A}_1 - \mathbf{A}_2$  are fulfilled by the angular probability measure  $\Phi_{n/k}$ . Let  $\delta \in (0, 1)$  and  $\mathcal{G}_{J,\alpha} = \mathcal{G}_J \cap \mathcal{G}_\alpha$ . With probability at least  $1 - \delta$ , we have*

$$R(\widehat{\Omega}_\alpha) \leq \left( 1 + \frac{1}{K_{\Phi_{n/k}}^{-1}(1 - \alpha)} \right) \inf_{1 \leq J \leq J_{\max}} \min_{\Omega \in \mathcal{G}_{J,\alpha}} \left\{ \lambda_d(\Omega) - \lambda_d(\Omega_\alpha^*) + 2\psi_k(2^{-J}\delta, J) \right\}.$$

## 3 On the bias of the MV-set estimation procedure

As the class  $\mathcal{G}_J$  contains sets that consists in union of hypercubes, the box-counting class of angular distributions (see [6]), which contains all angular distributions such that the boundary  $\partial\Omega_\alpha^*$  has Lipschitz regularity, seems appropriate to control the bias introduced by the MV-set estimation procedure. Let  $c_1 > 0$  and  $N_J(\partial\Omega_\alpha^*)$  denote the number of hypercubes that intersect  $\partial\Omega_\alpha^*$ . The box counting class  $\mathcal{D}_{box}$  is the set of all distributions such that

$$\mathbf{A}_3 \quad N_J(\partial\Omega_\alpha^*) \leq c_1 J^{d-2}.$$

As explained in [7], assumption  $\mathbf{A}_3$  is more convenient than only assuming that  $\partial\Omega_\alpha^*$  has Lipschitz boundary. It allows boundaries with arbitrary orientation and multiple connected components whereas the Lipschitz boundary assumption restricts the boundary to have a functional form. For further discussion on the connection between assumption  $\mathbf{A}_3$  and Lipschitz regularity of the boundary  $\partial\Omega_\alpha^*$ , see Lemma 3 in [7].

**Remark 1.** *Other approaches are possible to control the bias of the MV-set estimation procedure. For instance, one can assume that  $\partial\Omega_\alpha^*$  has a finite perimeter [3].*

Let  $J \in \{1, \dots, J_{max}\}$ ,  $\delta \in (0, 1)$  and  $\Omega_\alpha^J$  denote a solution of  $\min_{\Omega \in \mathcal{G}_{J,\alpha}} \lambda_d(\Omega)$ . If the angular distribution  $\Phi_{n/k} \in \mathcal{D}_{box}$  then,

$$\min_{\Omega \in \mathcal{G}_{J,\alpha}} \lambda_d(\Omega) - \lambda_d(\Omega_\alpha^*) \leq \lambda_d(\Omega_\alpha^J \Delta \Omega_\alpha^*) \leq N_J(\partial\Omega_\alpha^*) \frac{1}{J} \leq \frac{c_1}{J}$$

where the second inequality comes from the fact that the two sets can only differ on the hypercubes that intersect  $\partial\Omega_\alpha^*$ .

## 4 Setting the tolerance parameter to 0 for the numerical experiments

The tolerance parameter  $\psi_k(\delta)$  is set to 0 in the numerical experiments of the paper. As remarked by one of the reviewers this loses the connection between Theorem 1 and the experiments. However by corollary 12 in [6], one can solve the empirical minimum volume set optimization problem without the tolerance parameter in the mass constraint and obtain a theoretical result similar to the one of Theorem 1.

## References

- [1] J. Beirlant, Y. Goegebeur, J. Segers, and J. Teugels. *Statistics of Extremes: Theory and Applications*. Wiley Series in Probability and Statistics, 2005.
- [2] S. Boucheron, O. Bousquet, and G. Lugosi. Theory of Classification: A Survey of Some Recent Advances. *ESAIM: Probability and Statistics*, 9:323–375, 2005.
- [3] S. Cléménçon and J. Jakubowicz. Scoring anomalies: a M-estimation formulation. In *Proceedings of the 16-th International Conference on Artificial Intelligence and Statistics, Scottsdale, USA*, 2013.
- [4] L. Devroye, L. Györfi, and G. Lugosi. *A Probabilistic Theory of Pattern Recognition*. Springer, 1996.
- [5] N. Goix, A. Sabourin, and S. Cléménçon. Learning the dependence structure of rare events: a nonasymptotic study. In *Proceedings of the International Conference on Learning Theory, COLT'15*, 2015.

- [6] C. Scott and R. Nowak. Learning Minimum Volume Sets. *Journal of Machine Learning Research*, 7:665–704, 2006.
- [7] C. Scott and R. D. Nowak. Minimax-Optimal Classification With Dyadic Decision Trees. *Information Theory, IEEE Transactions on*, 52(4):1335–1353, 2006.
